# Supplementary material for: Aggregate emission behaviors and reversible mechanofluorochromic properties of α-cyanostilbene functionalized indolo[3,2-b]carbazole derivatives
Source: Royal Society of Chemistry journal article supplement (doi:10.1039/d2ce01015a), 2022-01-01
Supplement: d2ce01015a1.pdf [file d2ce01015a1.pdf]

*Supporting Information for*

**Aggregate emission behaviors and reversible mechanofluorochromic properties of  $\alpha$ -cyanostilbene functionalized indolo[3,2-*b*]carbazole derivatives**

Yuyang Zhang\*, Fuqiang Chen, Jie Zheng, Zhongming Song, Yanping Wang,  
Yueyuan Mao, Jing Tang, Jiahao Guo and Xuchun Wang

**Contents**

1. The spectroscopic characterization.
2. Summary of crystallographic data.
3. Single crystal data.
4. The molecular packing structure.
5. The UV-vis spectra and fluorescence spectra in different solvents.
6. Photophysical data in different polar solvents.
7. Optimized molecular structure and HOMO-LUMO levels.
8. Aggregates fluorescent behaviors.
9. The fluorescent spectra in solid state.
10. Emission wavelength change during the ground-fumed cycles.
11. The DSC curves of pristine and ground state.

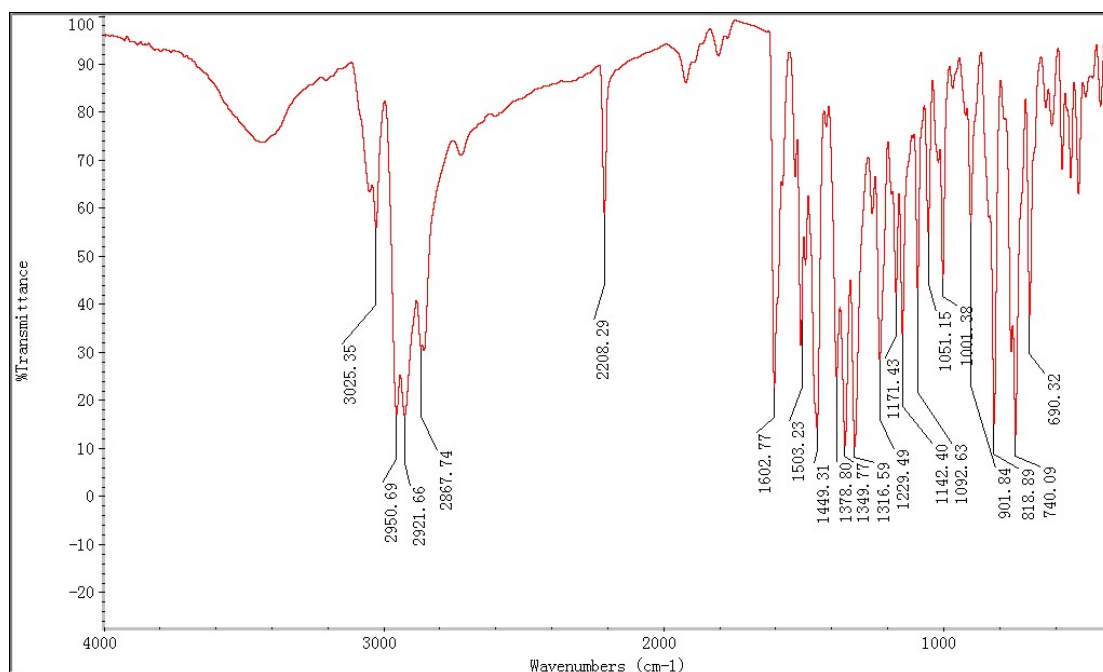

Fig. S1 FT-IR spectrum of ICZH.

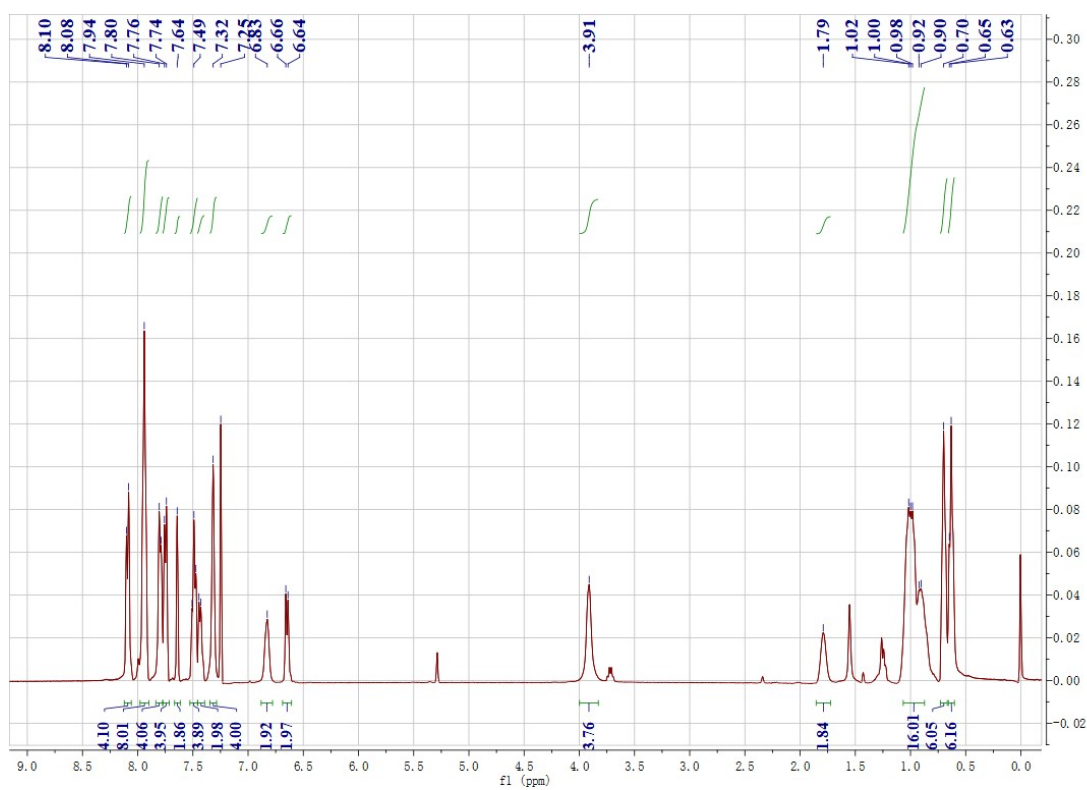

Fig. S2 <sup>1</sup>H NMR spectrum of ICZH in CDCl<sub>3</sub>.

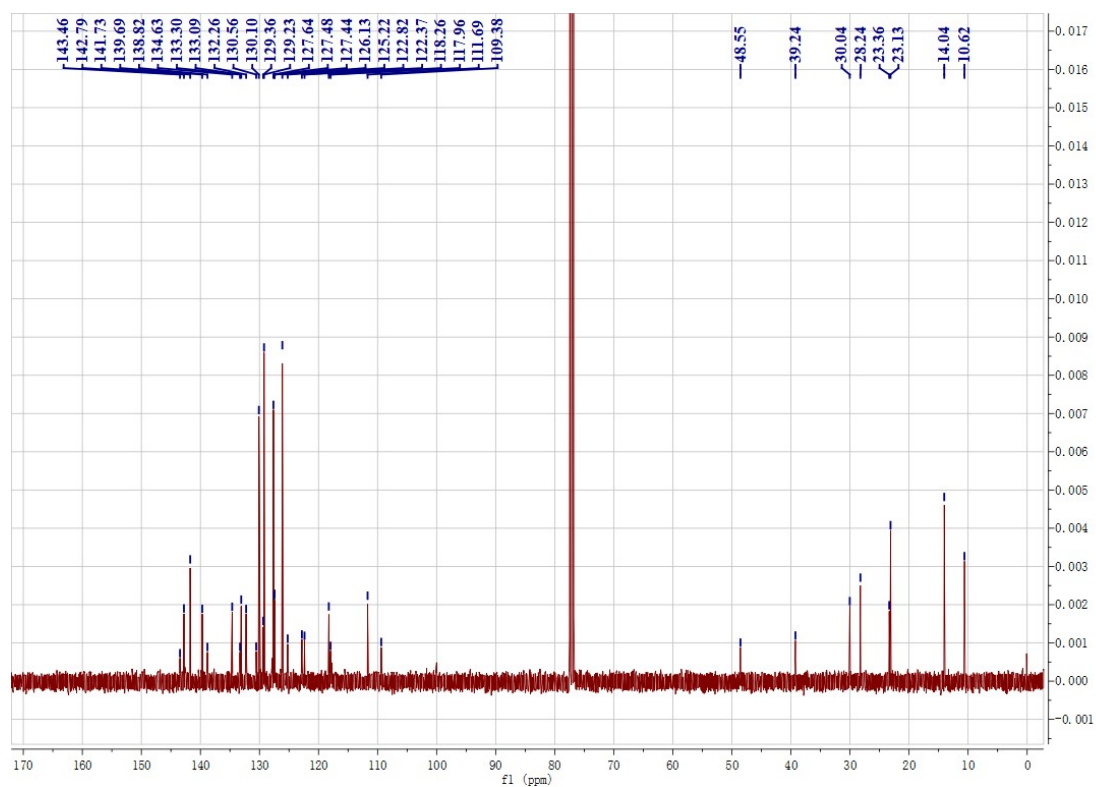

Fig. S3  $^{13}\text{C}$  NMR spectrum of ICZH in  $\text{CDCl}_3$ .

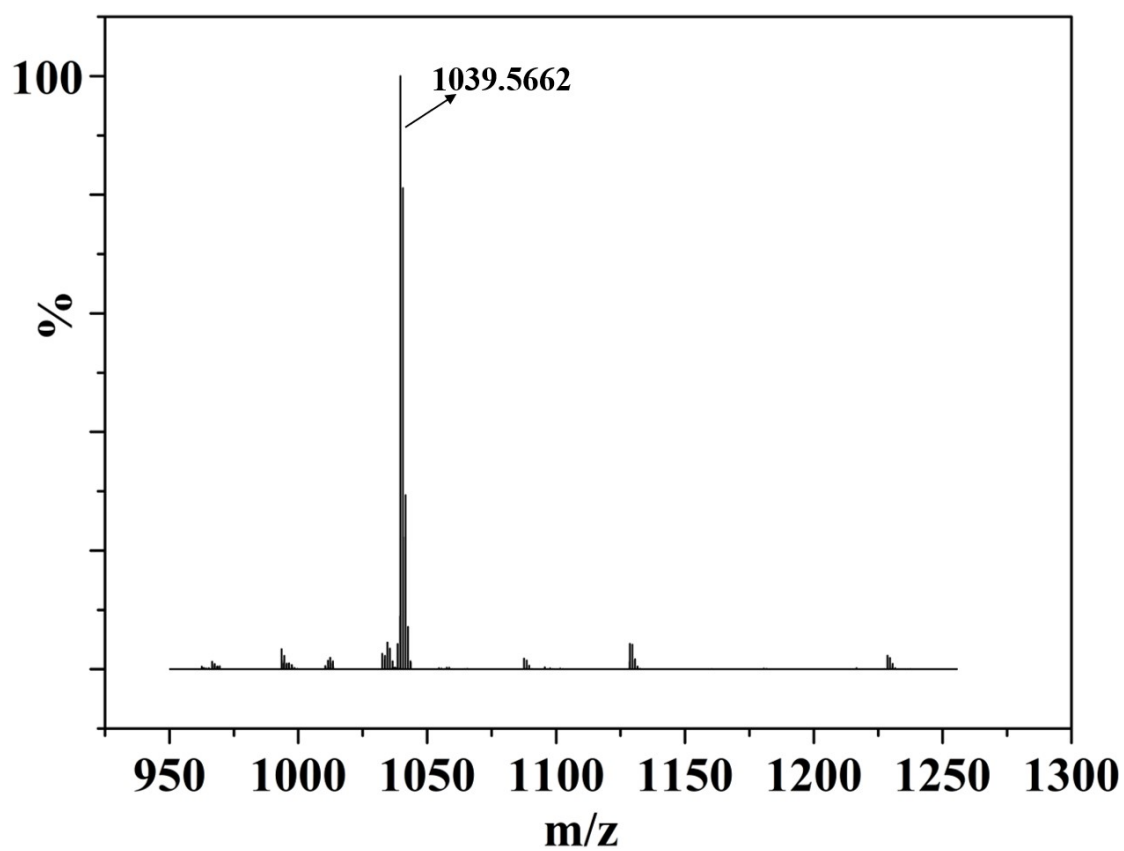

Fig. S4 HP-MS spectrum of ICZH.

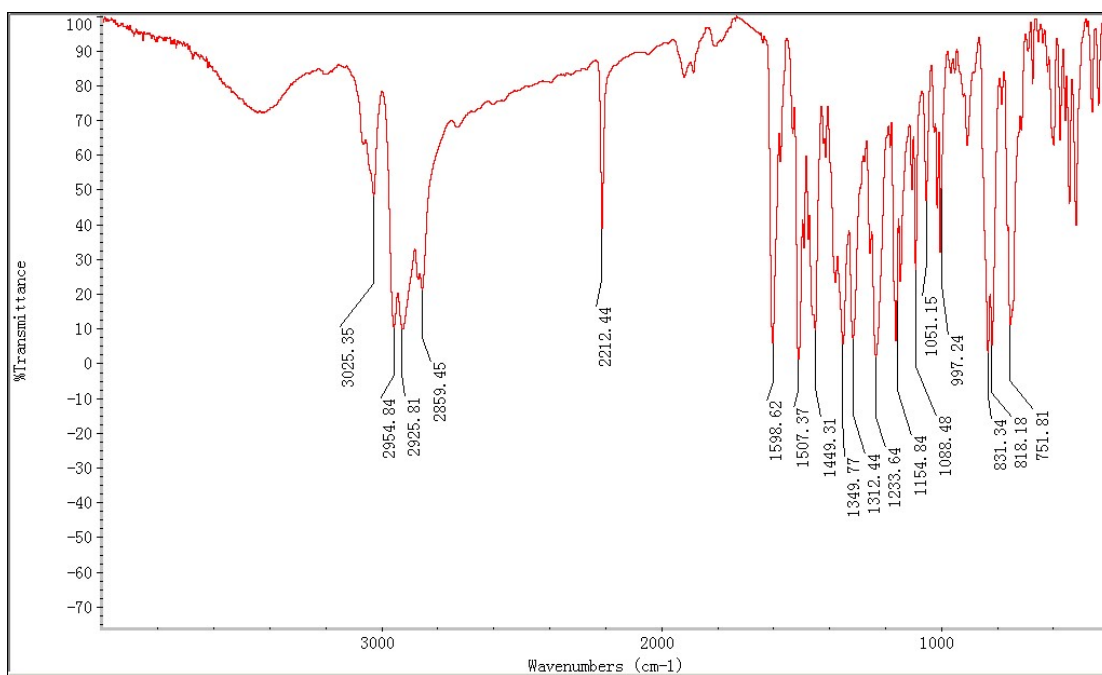

Fig. S5 FT-IR spectrum of ICZF.

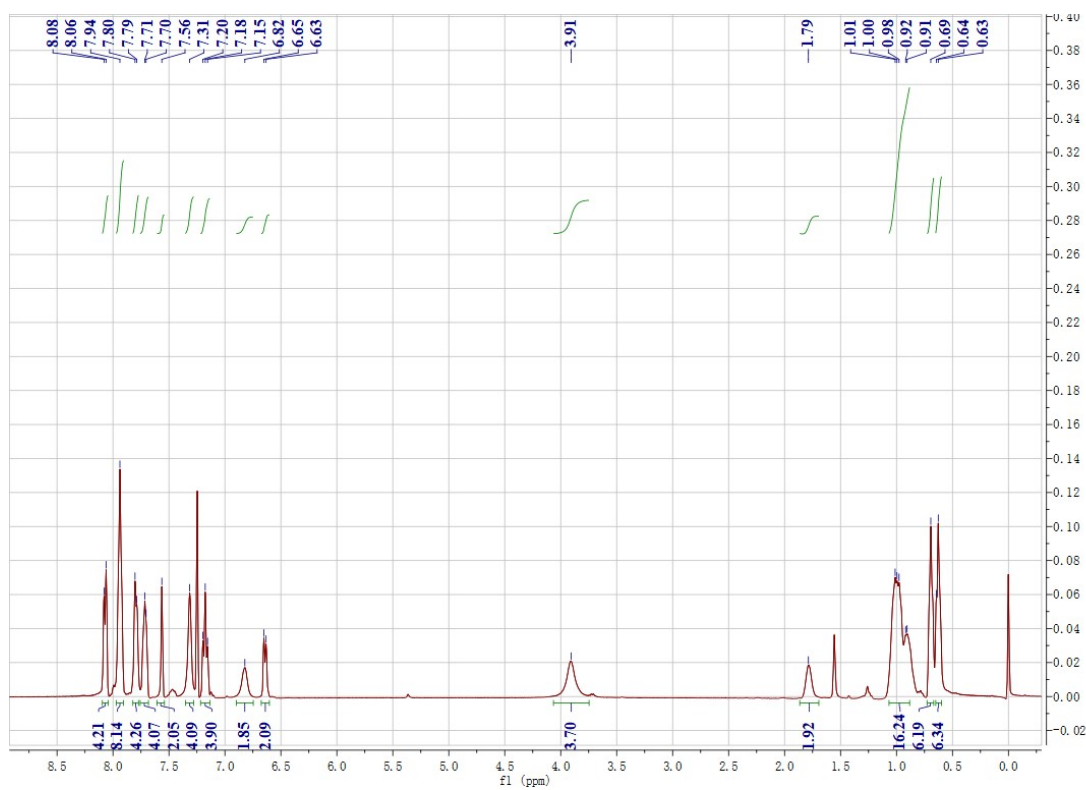

Fig. S6 <sup>1</sup>H NMR spectrum of ICZF in CDCl<sub>3</sub>.

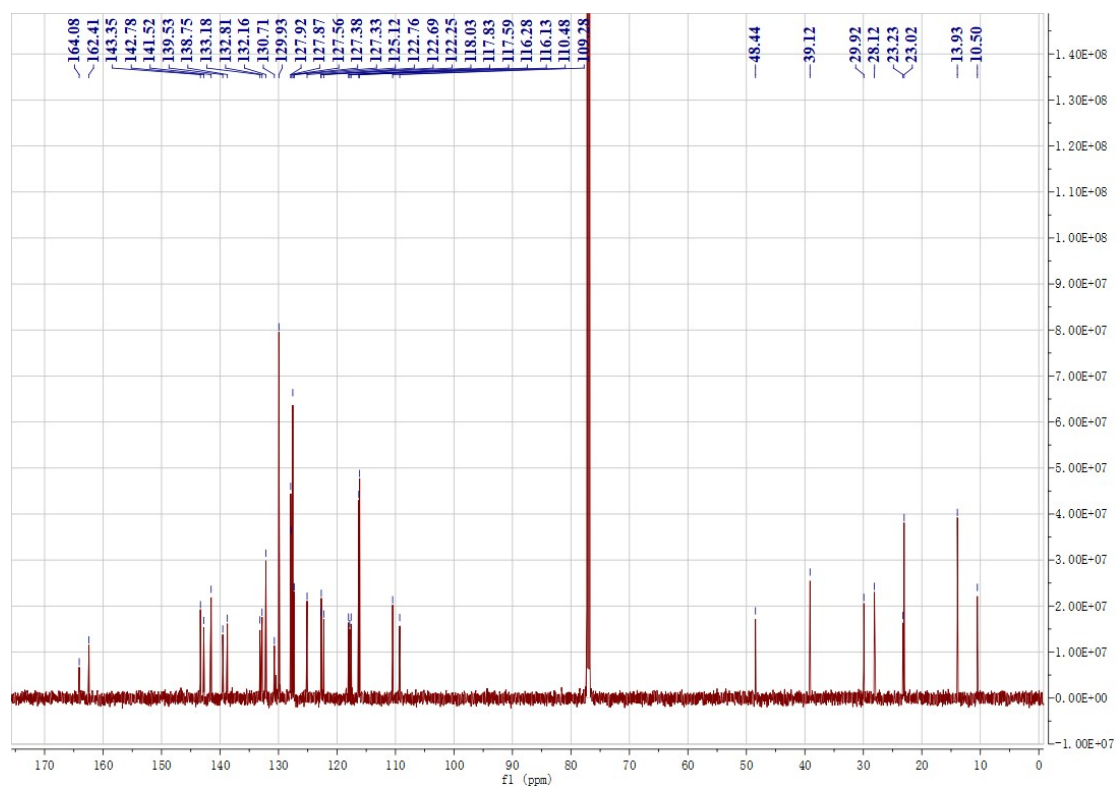

Fig. S7  $^{13}\text{C}$  NMR spectrum of ICZF in  $\text{CDCl}_3$ .

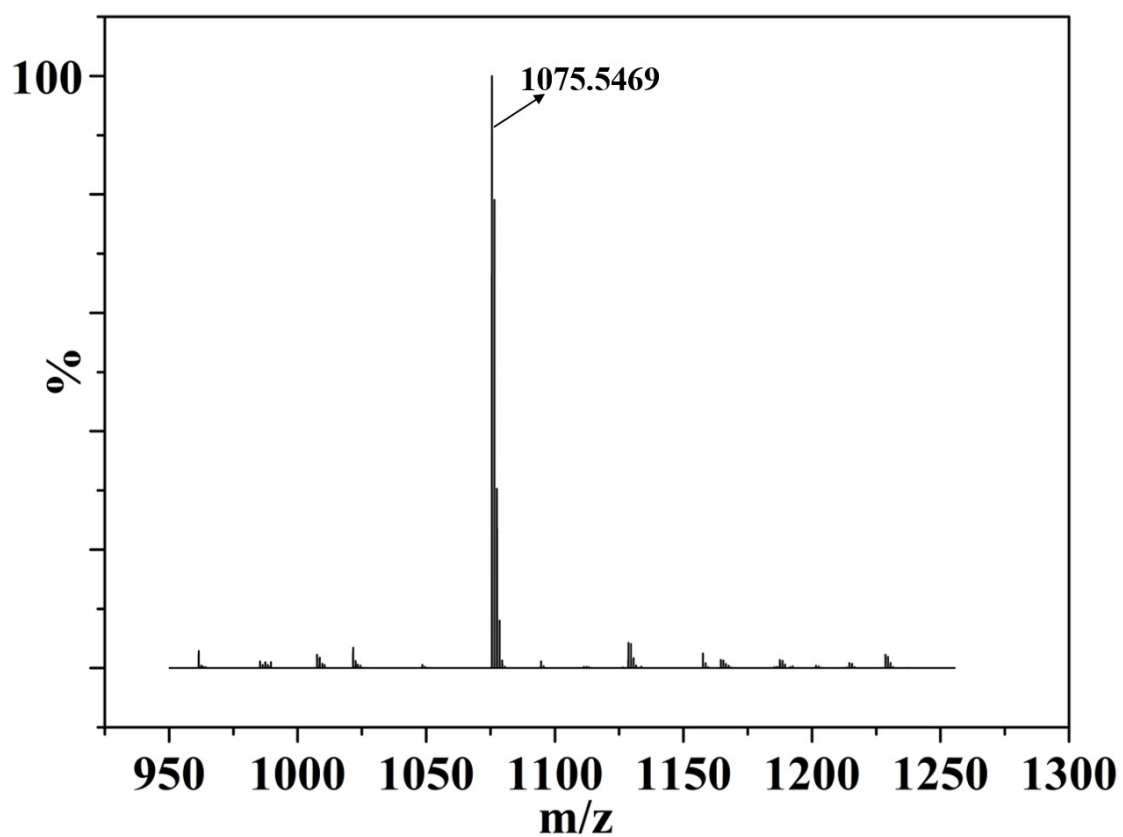

Fig. S8 HP-MS spectrum of ICZF.

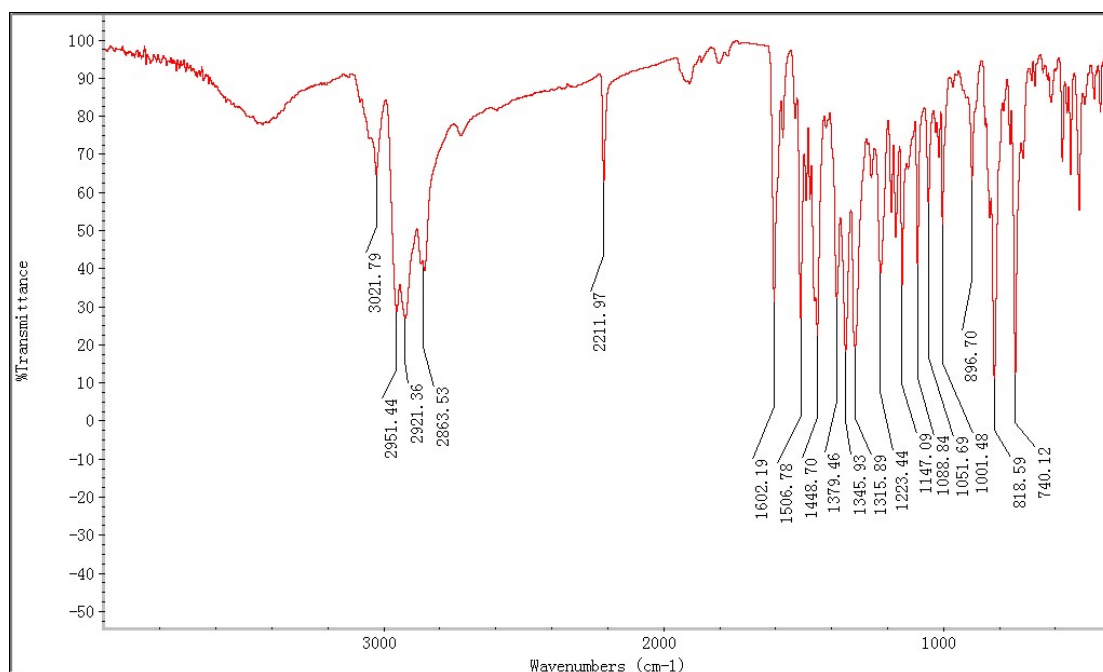

Fig. S9 FT-IR spectrum of ICZCH<sub>3</sub>.

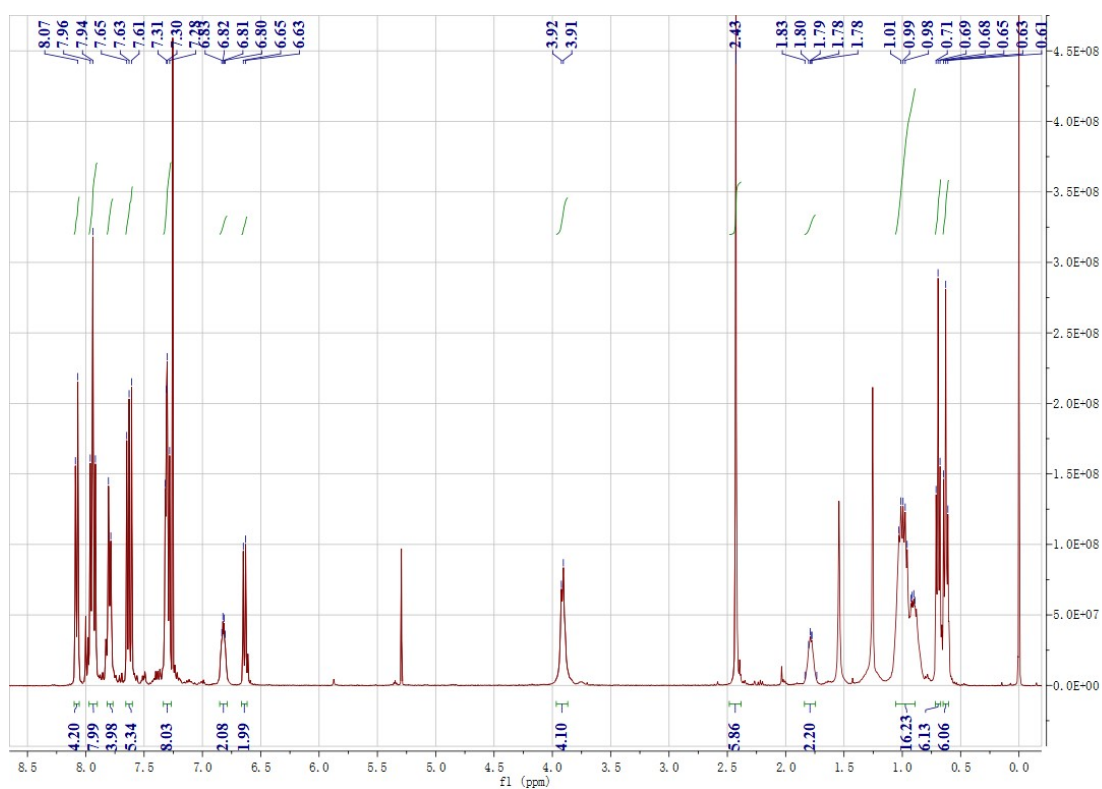

Fig. S10 <sup>1</sup>H NMR spectrum of ICZCH<sub>3</sub> in CDCl<sub>3</sub>.

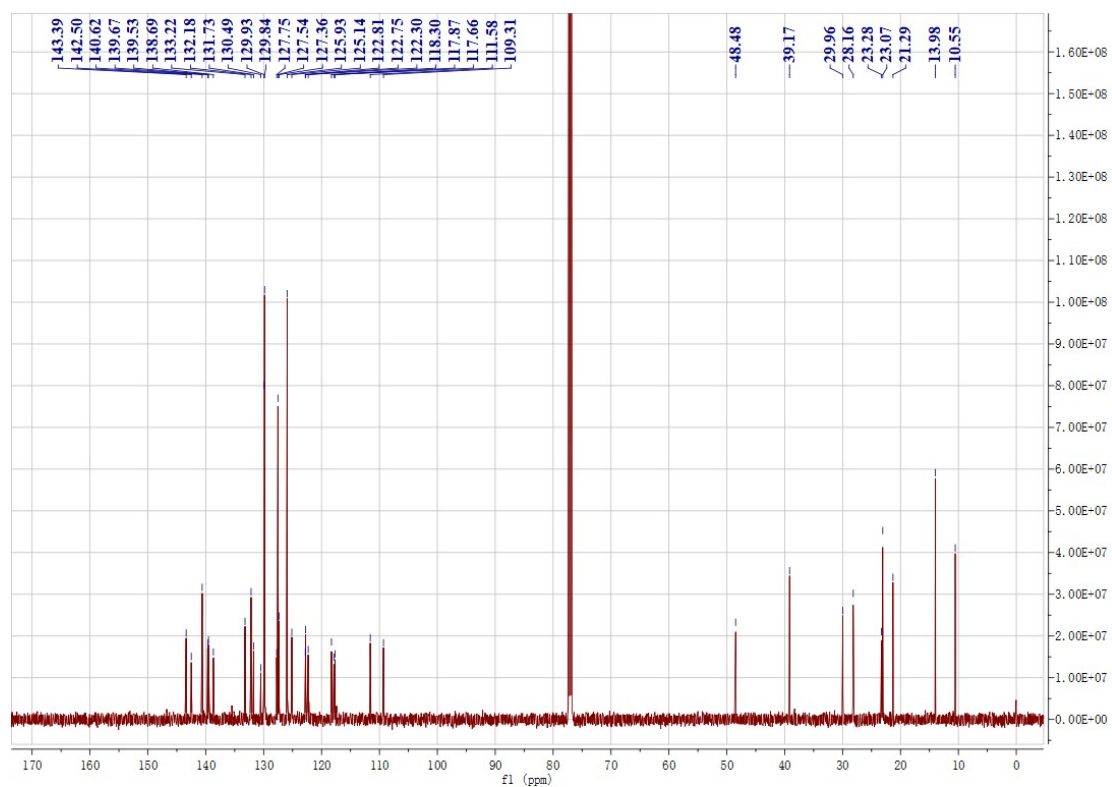

Fig. S11  $^{13}\text{C}$  NMR spectrum of  $\text{ICZCH}_3$  in  $\text{CDCl}_3$ .

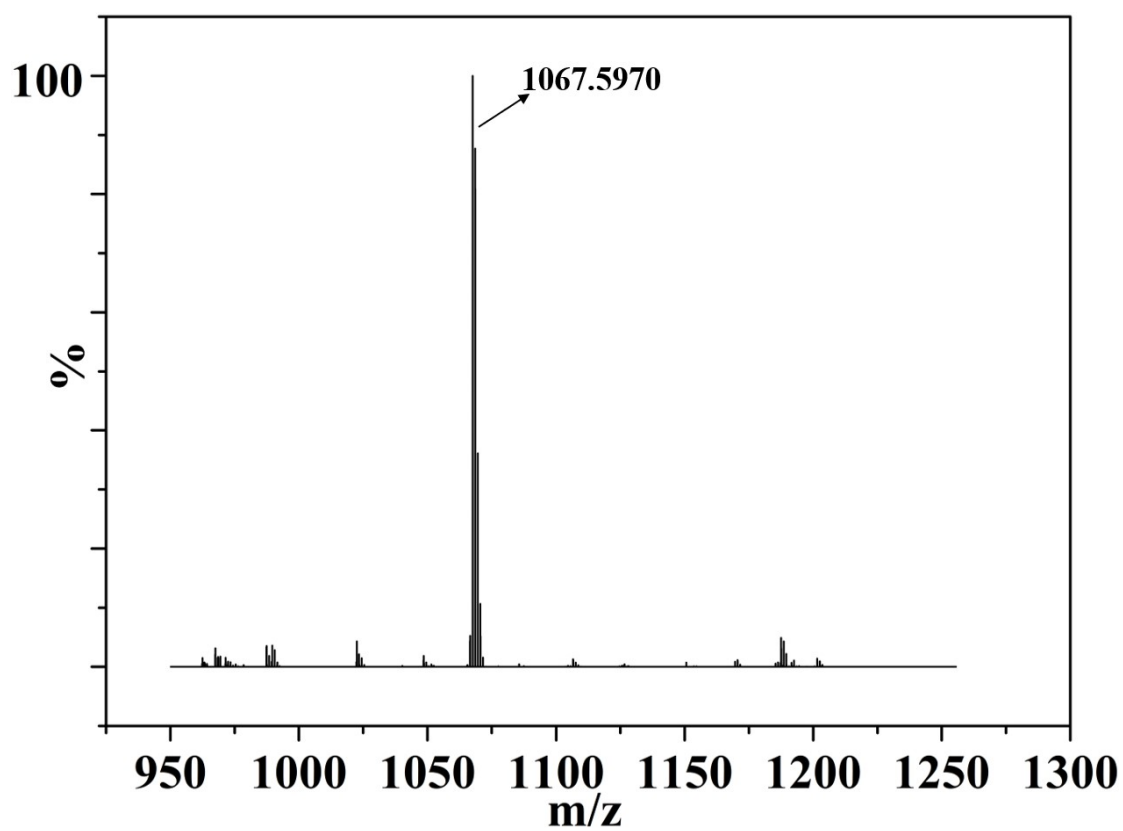

Fig. S12 HP-MS spectrum of  $\text{ICZCH}_3$ .

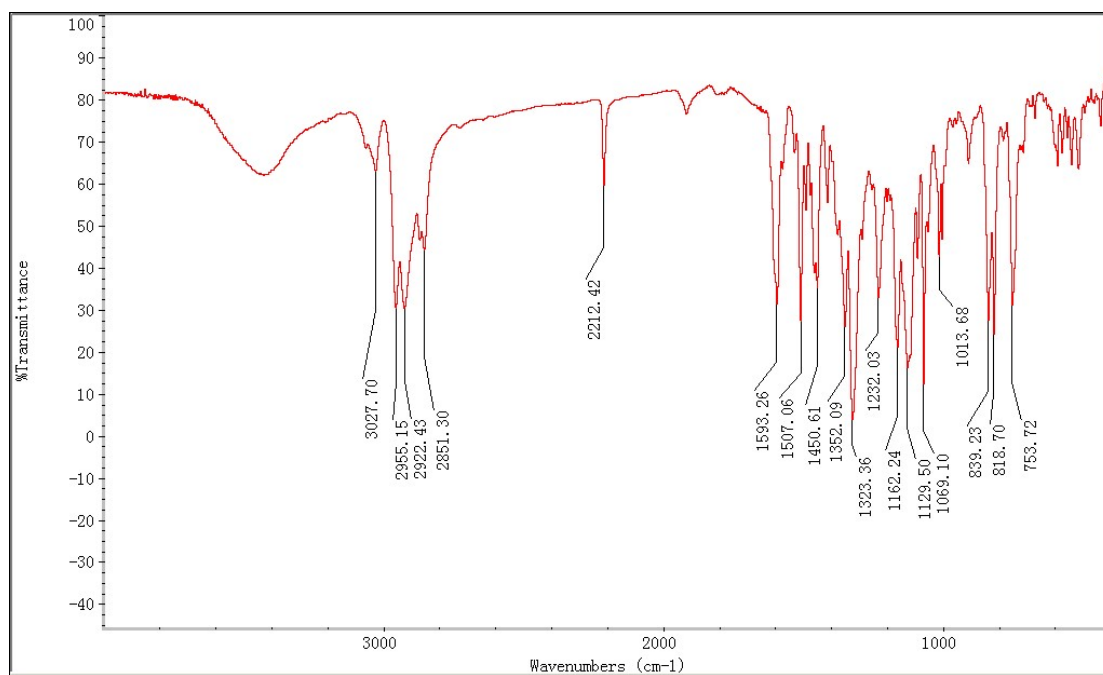

Fig. S13 FT-IR spectrum of ICZCF<sub>3</sub>.

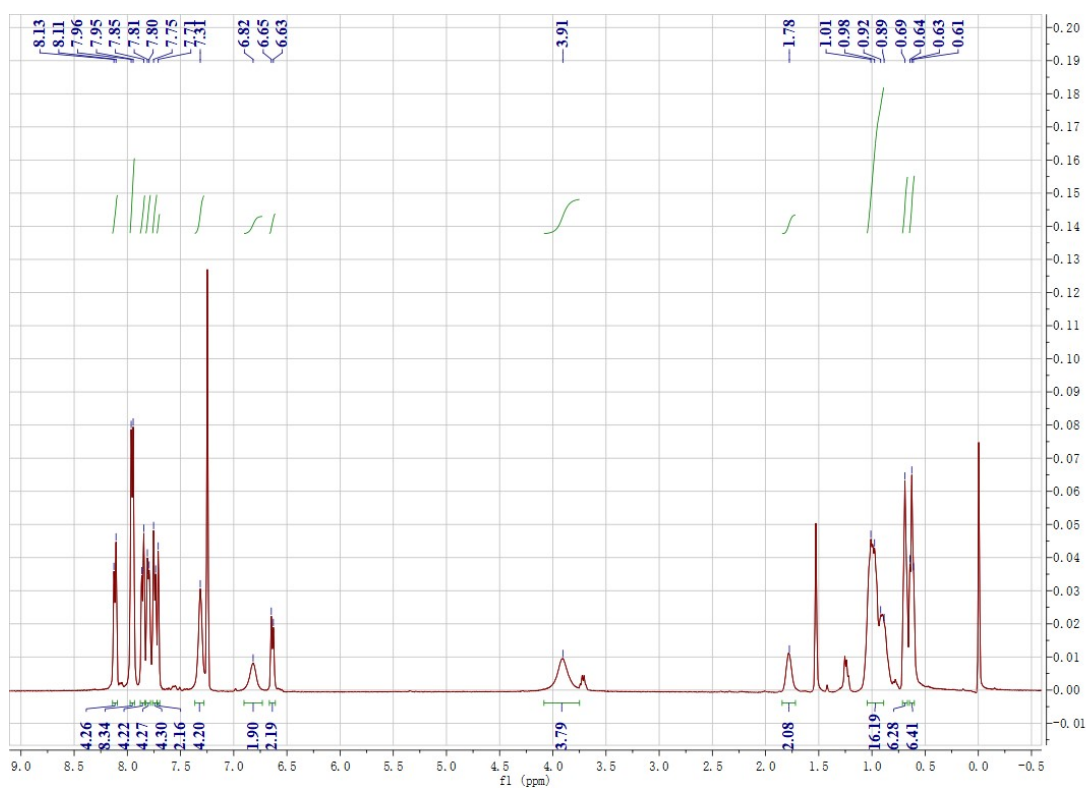

Fig. S14 <sup>1</sup>H NMR spectrum of ICZCF<sub>3</sub> in CDCl<sub>3</sub>.



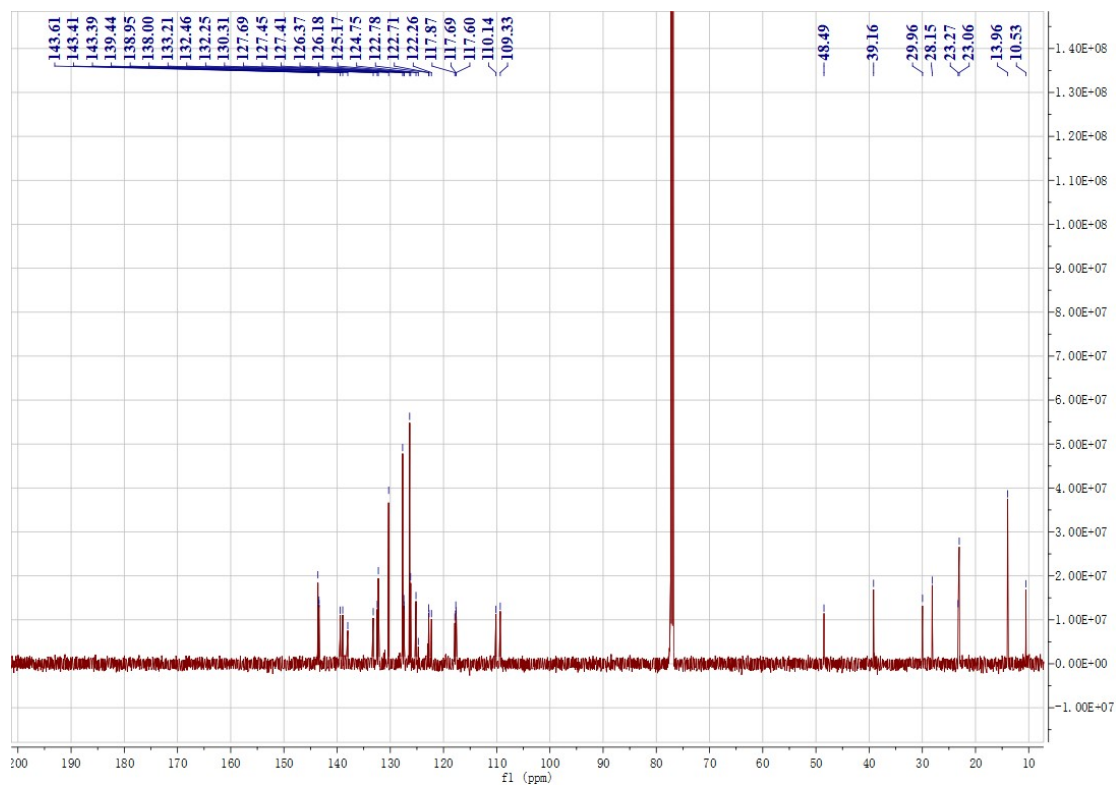

Fig. S15  $^{13}\text{C}$  NMR spectrum of  $\text{ICZCF}_3$  in  $\text{CDCl}_3$ .

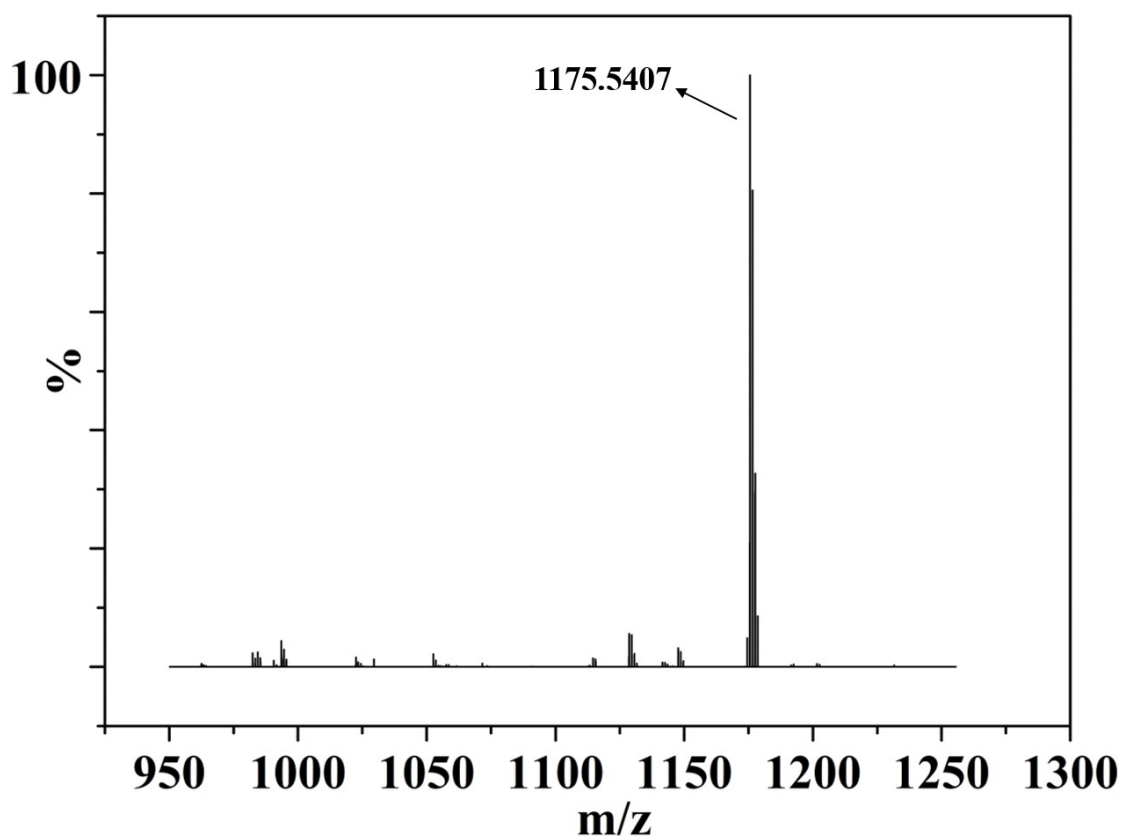

Fig. S16 HP-MS spectrum of  $\text{ICZCF}_3$ .

Table S1 Summary of crystallographic data for compound **ICZCF<sub>3</sub>**

| Identification                 | <b>ICZCF<sub>3</sub></b>                     | <i>Data/restraints/paramete</i>         |                                                               |
|--------------------------------|----------------------------------------------|-----------------------------------------|---------------------------------------------------------------|
|                                |                                              | <i>rs</i>                               | 6759/6/400                                                    |
| Wavelength (Å)                 | 1.54178                                      | Final R indices [I>2σ(I)]               | $R_1 = 0.2572$<br>$wR_2 = 0.5680$                             |
| Crystal system                 | triclinic                                    |                                         |                                                               |
| Space group                    | $\bar{p}1$                                   | Empirical formula                       | C <sub>78</sub> H <sub>68</sub> F <sub>6</sub> N <sub>4</sub> |
| <i>a</i> (Å)                   | 10.0055(2)                                   | Formula weight                          | 1175.36                                                       |
| <i>b</i> (Å)                   | 13.0597(3)                                   | <i>F</i> (000)                          | 618                                                           |
| <i>c</i> (Å)                   | 14.2217(3)                                   | <i>Volume</i>                           | 1696.84(6)                                                    |
| <i>a</i> (°)                   | 101.9360(10)                                 | Z, Calculated density                   | 2, 1.150 g/cm <sup>3</sup>                                    |
| <i>β</i> (°)                   | 104.1170(10)                                 | <i>Goodness-of-fit on F<sup>2</sup></i> | 2.705                                                         |
| <i>γ</i> (°)                   | 101.9760(10)                                 | Largest diff. peak and hole             | 3.883 and -0.629 e.Å <sup>-3</sup>                            |
| Reflections collected / unique | 14629/6759<br>[R(int) = 0.0342]              | <i>θ</i> range for data collection      | 3.33 to 74.47 °                                               |
| Limiting indices               | -12 ≤ h ≤ 11<br>-16 ≤ k ≤ 15<br>-17 ≤ l ≤ 17 | R indices (all data)                    | $R_1 = 0.2756$<br>$wR_2 = 0.5934$                             |

Table S2 Selected Bond distance (Å), bond angle (°) and torsion angle (°) for compound **ICZ-CF<sub>3</sub>**

| Bond distance (Å) |          | bond angle (°) |           | torsion angle (°) |         |
|-------------------|----------|----------------|-----------|-------------------|---------|
| F3-C1             | 1.326(9) | C31-N2-C24     | 108.0(4)  | F2-C1-C2-C5       | -121.24 |
| N2-C32            | 1.463(6) | C31-N2-C32     | 123.0(5)  | F2-C1-C2-C3       | 58.02   |
| N2-C31            | 1.385(7) | C15-C14-C17    | 121.7(5)  | C1-C2-C3-C4       | 179.08  |
| N2-C24            | 1.403(7) | C13-C14-C17    | 119.9(5)  | N1-C9-C8-C7       | 2.23    |
| N1-C9             | 1.161(8) | C5-C2-C1       | 122.3(6)  | C10-C8-C7-C6      | 169.46  |
| C22-C21           | 1.382(7) | F2-C1-F3       | 105.7(7)  | C11-C10-C8-C9     | -7.76   |
| C22-C17           | 1.407(8) | F2-C1-C2       | 114.4(6)  | C13-C14-C17-C22   | -142.14 |
| C23-C20           | 1.500(6) | C6-C7-C8       | 120.9(5)  | C21-C20-C23-C24   | 92.17   |
| C14-C17           | 1.478(7) | N2-C32-C33     | 115.5(5)  | C23-C24-N2-C32    | 2.70    |
| C11-C10           | 1.464(7) | C34-C33-36     | 108.4(14) | C33-C32-N2-C31    | 92.63   |
| C8-C7             | 1.483(7) | C27-C26-C25    | 135.4(5)  | C20-C23-C25-C26   | 1.82    |
| C31-C26           | 1.417(7) | C31-C26-C25    | 106.1(5)  | C32-C33-C34-C35   | 162.91  |
| C29-C28           | 1.374(9) | C32-C33-C36    | 105.3(8)  | C33-C36-C37-C38   | 152.68  |
| C29-C30           | 1.383(8) | C24-C25-C26    | 106.9(4)  | F1-C1-C2-C3-C5    | -114.94 |

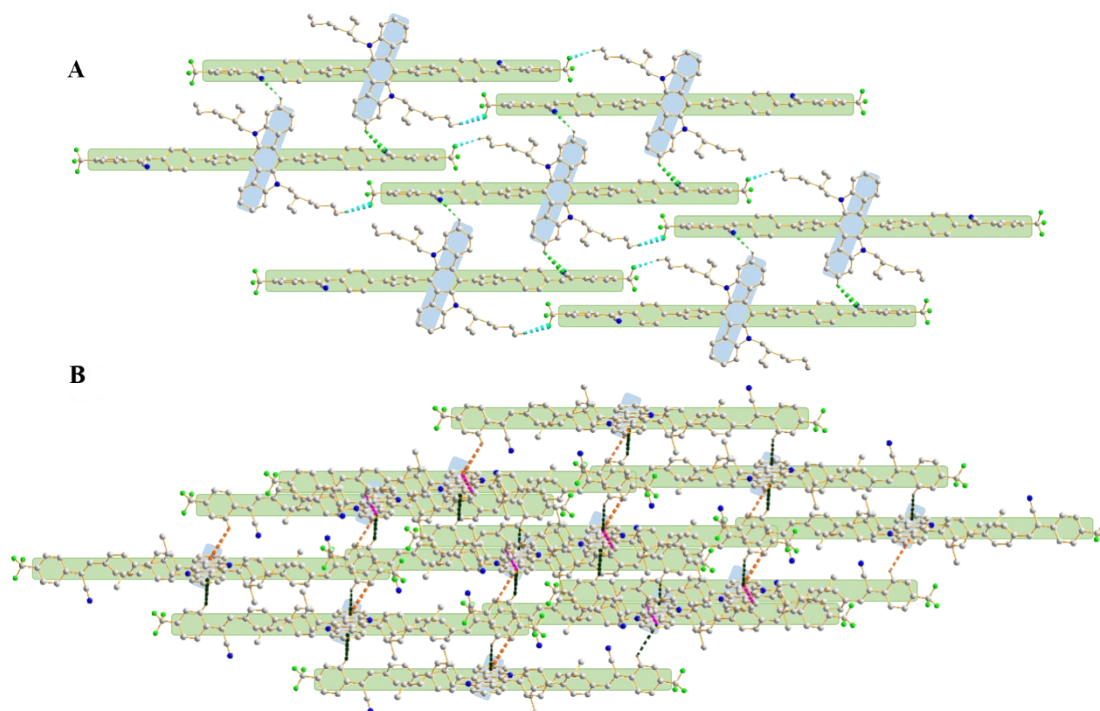

Fig. S17 (A) The molecular packing by hydrogen bond interaction and (B) C-H $\cdots$  $\pi$  interaction (hydrogen atoms are omitted for the sake of clarity).

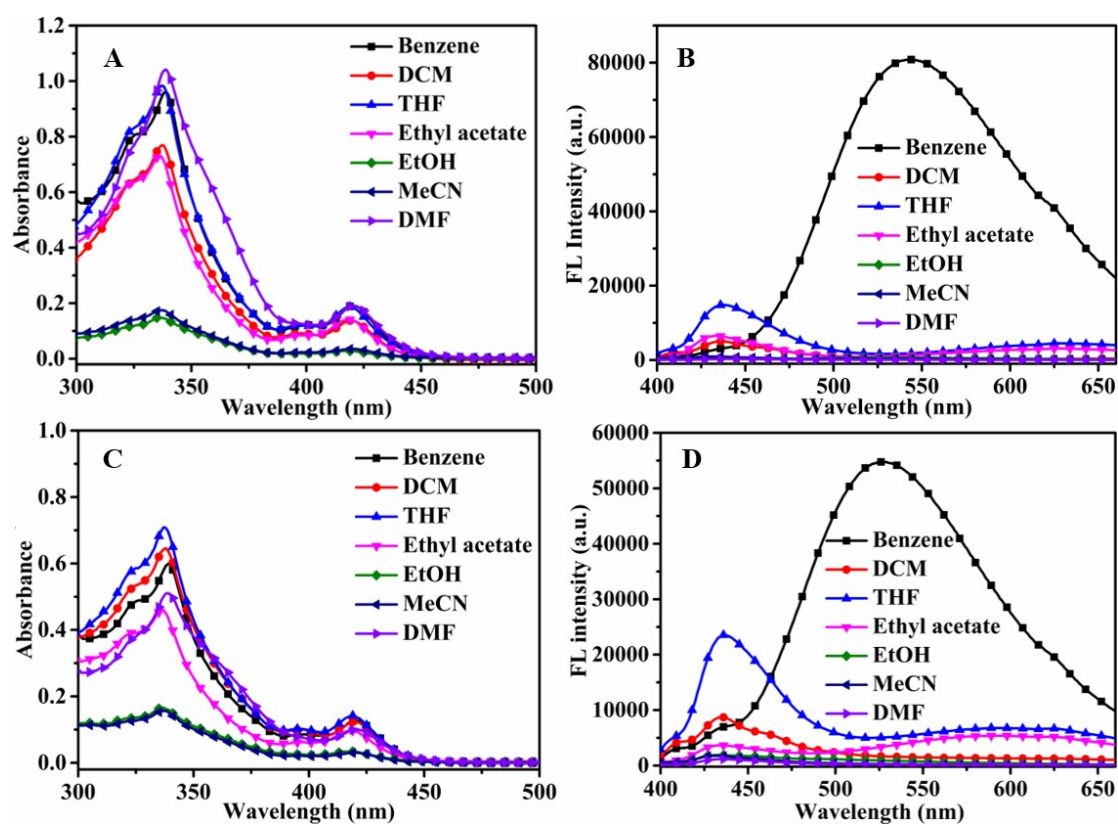

Fig. S18 (A, C) The UV-vis spectra and (B, D) fluorescence spectra of compounds **ICZH** and **ICZCH<sub>3</sub>** in different solvents, respectively.

**Table S3** Photophysical properties of compounds **ICZ-H**, **ICZ-F**, **ICZ-CH<sub>3</sub>** and **ICZ-CF<sub>3</sub>** in different polar solvents.

| Compounds                | Solvents      | $\lambda$ [a] max | $\lambda$ [b] max | $\epsilon$ ( $\times 10^4$ ) <sup>[c]</sup> | $\Delta\nu$ <sup>[d]</sup> | $\Phi$ <sup>[e]</sup> |
|--------------------------|---------------|-------------------|-------------------|---------------------------------------------|----------------------------|-----------------------|
| <b>ICZH</b>              | Benzene       | 339               | 544               | 9.58                                        | 11116                      |                       |
|                          | DCM           | 338               | 436               | 7.68                                        | 6650                       |                       |
|                          | THF           | 337               | 437               | 9.85                                        | 6790                       |                       |
|                          | Ethyl acetate | 336               | 434               | 7.28                                        | 6720                       | 17.53%                |
|                          | EtOH          | 336               | /                 | 1.44                                        | /                          |                       |
|                          | MeCN          | 336               | 433               | 1.80                                        | 6667                       |                       |
|                          | DMF           | 339               | /                 | 10.42                                       | /                          |                       |
| <b>ICZF</b>              | Benzene       | 339               | 541               | 7.90                                        | 11014                      |                       |
|                          | DCM           | 338               | 436               | 9.03                                        | 6650                       | pristine:             |
|                          | THF           | 337               | 438               | 10.38                                       | 6843                       | 8.31%                 |
|                          | Ethyl acetate | 336               | 438               | 9.64                                        | 6931                       |                       |
|                          | EtOH          | 334               | 451               | 1.40                                        | 7767                       | ground:               |
|                          | MeCN          | 337               | 436               | 2.02                                        | 6738                       | 11.73%                |
|                          | DMF           | 338               | 443               | 7.08                                        | 7012                       |                       |
| <b>ICZCH<sub>3</sub></b> | Benzene       | 339               | 526               | 5.98                                        | 10487                      |                       |
|                          | DCM           | 337               | 434               | 6.44                                        | 6632                       |                       |
|                          | THF           | 338               | 436               | 7.07                                        | 6650                       |                       |
|                          | Ethyl acetate | 336               | 433               | 4.57                                        | 6667                       | 17.10%                |
|                          | EtOH          | 336               | 432               | 1.66                                        | 6614                       |                       |
|                          | MeCN          | 337               | 432               | 1.56                                        | 6525                       |                       |
|                          | DMF           | 338               | 432               | 5.08                                        | 6438                       |                       |
| <b>ICZCF<sub>3</sub></b> | Benzene       | 338               | 581               | 1.56                                        | 12374                      |                       |
|                          | DCM           | 338               | 436               | 3.21                                        | 6650                       | pristine:             |
|                          | THF           | 337               | 436               | 1.87                                        | 6738                       | 5.80%                 |
|                          | Ethyl acetate | 337               | 428               | 2.26                                        | 6309                       |                       |
|                          | EtOH          | 336               | 431               | 1.57                                        | 6560                       | ground:               |
|                          | MeCN          | 337               | 432               | 2.39                                        | 6525                       | 5.08%                 |
|                          | DMF           | 337               | 437               | 1.56                                        | 6790                       |                       |

[a] Peak position of the longest absorption band. [b] Peak position of fluorescence emission, excited at the absorption maximum. [c] Molar absorptivity (L/cm/mol). [d] Stokes' shift in  $\text{cm}^{-1}$ . [e] Quantum yields in the solid state.

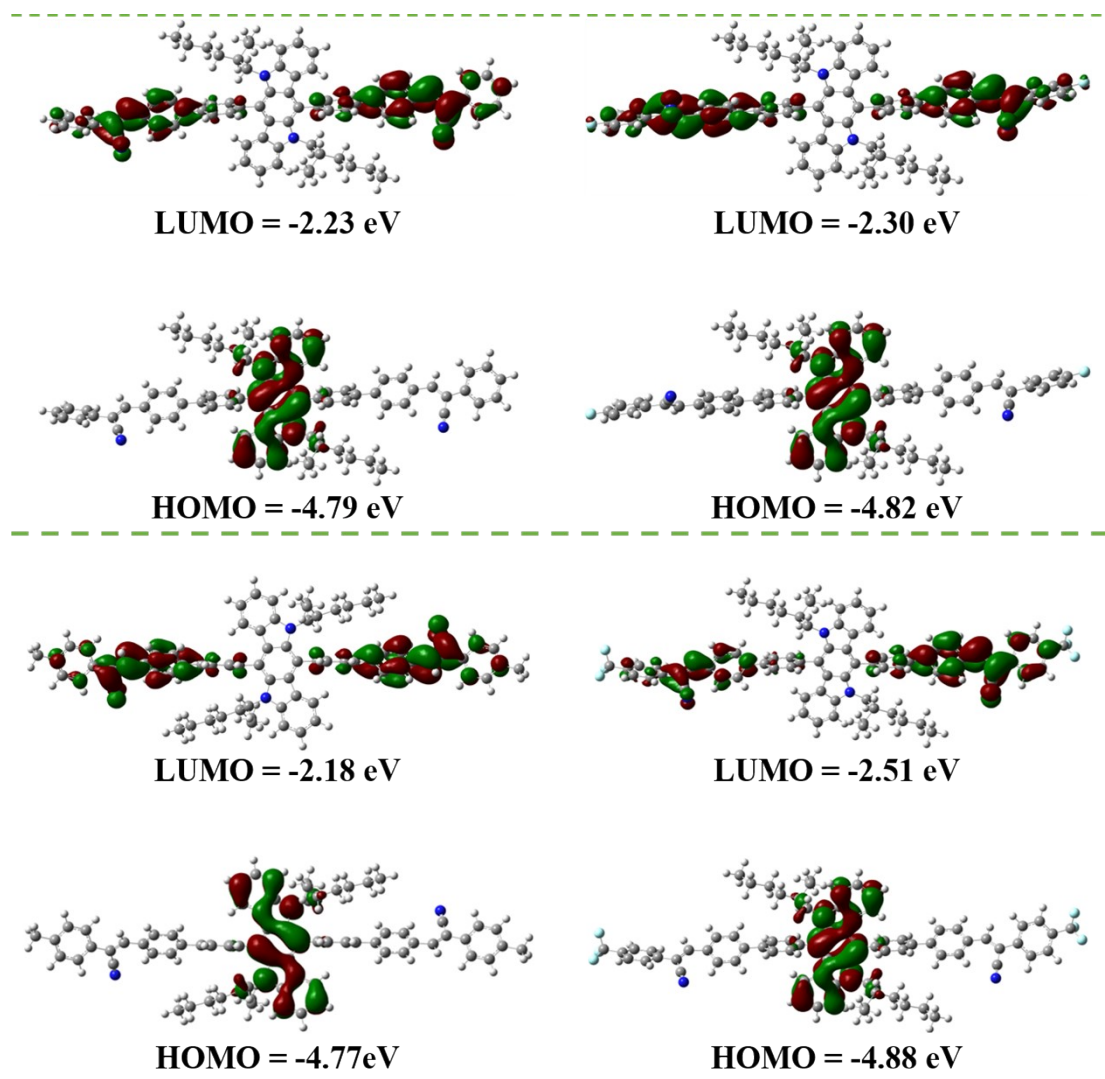

Fig. S19 Optimized molecular structure and molecular orbital amplitude plots of the HOMO and LUMO levels and electron cloud distribution of **ICZH**, **ICZF**, **ICZCH<sub>3</sub>** and **ICZCF<sub>3</sub>** calculated using the B3LYP/6-31G\* basis set.

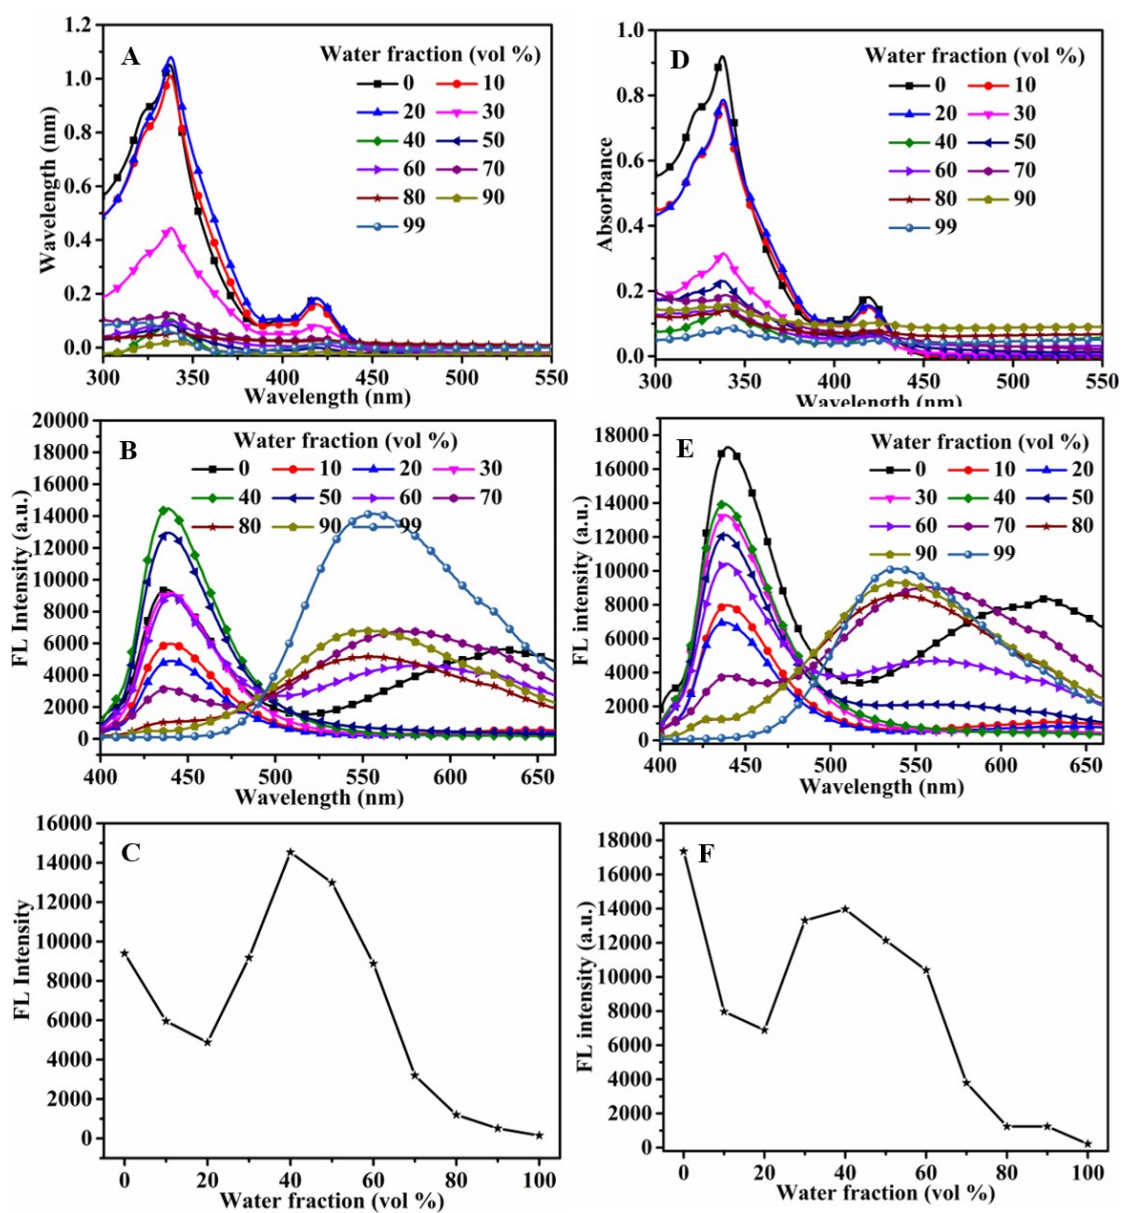

Fig. S20 (A, D) The UV-vis absorption and (B, E) fluorescence spectra of compounds ICZH and ICZCH<sub>3</sub> in THF-water mixtures with different water volume fractions; (C, F) the effect of water volume fractions on the emission intensity of 440 nm.

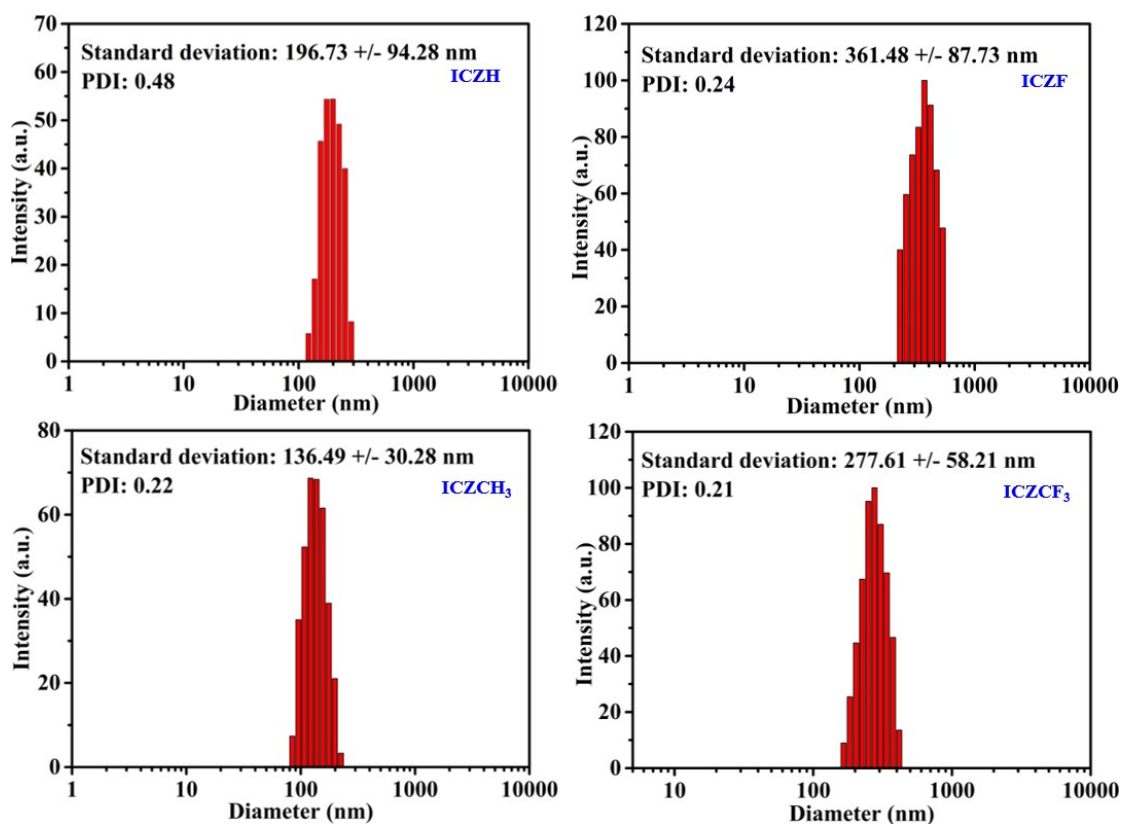

Fig. S21 Size distributions of **ICZH**, **ICZF**, **ICZCH<sub>3</sub>** and **ICZCF<sub>3</sub>** in THF-H<sub>2</sub>O mixtures ( $f_w = 50\%$ ).

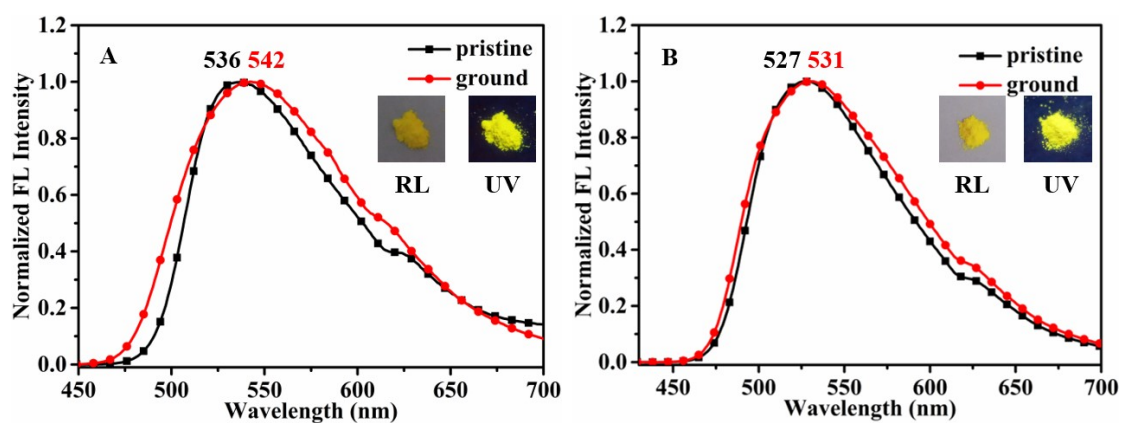

Fig. S22 Emission spectra of compound **ICZH** (A) and **ICZCH<sub>3</sub>** (B) of pristine and ground samples. Inset: Photographs under room light and 365 nm light.

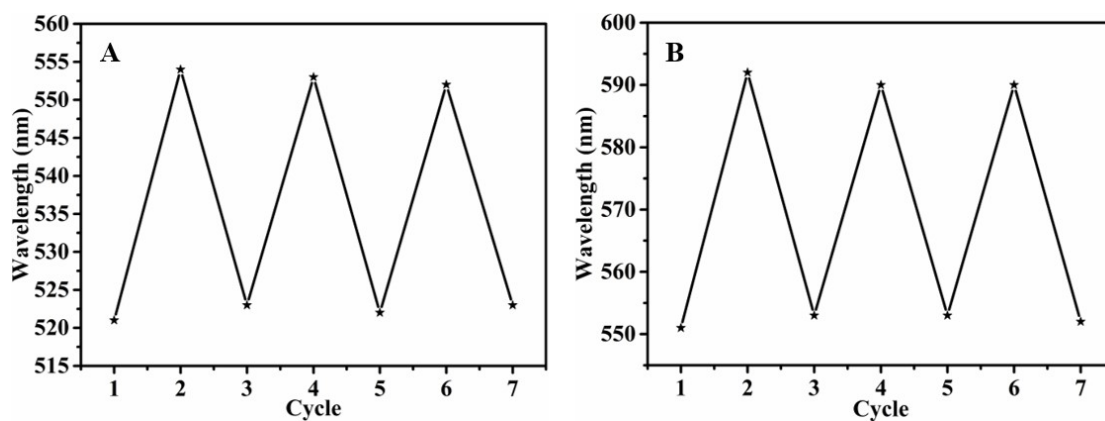

Fig S23 Repeated switching of compounds **ICZF** (A) and **ICZCF<sub>3</sub>** (B) by ground-fumed cycles.

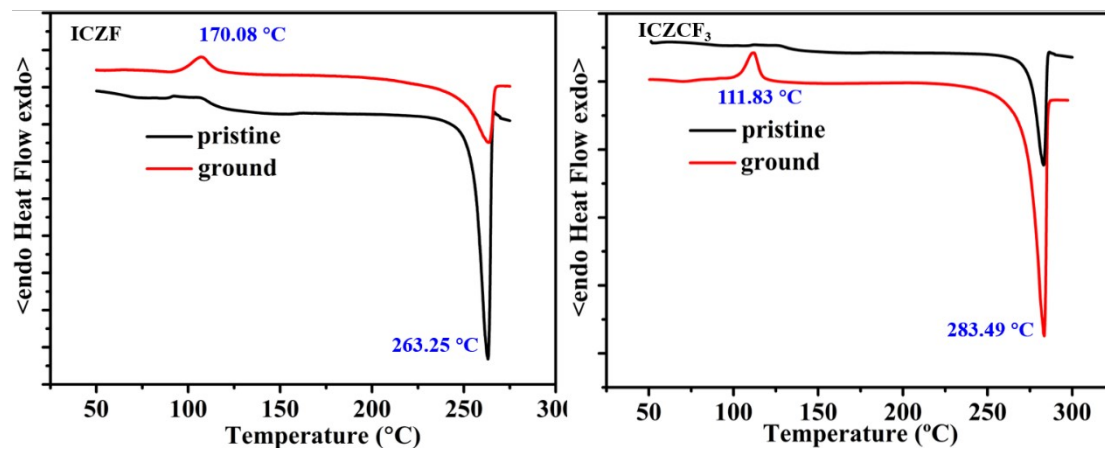

Fig. S24 DSC curve of compounds **ICZF** (A) and **ICZCF<sub>3</sub>** (B) in the pristine and ground powders. (Scan rate: 10 °C min<sup>-1</sup>).
